# Supplementary material for: Multiparent-Derived, Marker-Assisted Introgression Lines of the Elite Indian Rice Cultivar, ‘Krishna Hamsa’ Show Resistance against Bacterial Blight and Blast and Tolerance to Drought
Source: MDPI journal article supplement (doi:10.3390/plants11050622), 2022-02-25
Supplement: s1 [file plants-1577775-supplementary.pdf › plants-1577775-supplementary.pdf]

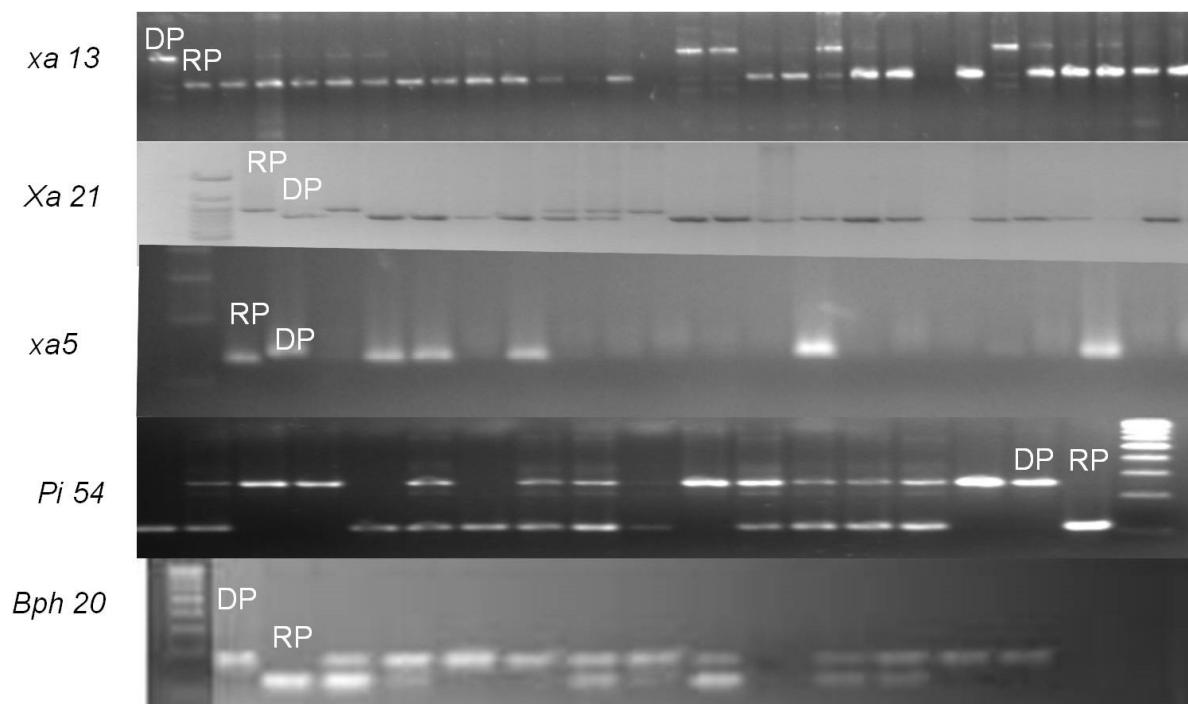

**Supplementary Figure S1.** Foreground selection in introgression lines in IC<sub>4</sub>F<sub>6</sub> generation for targeted genes *xa13*, *Xa21*, *xa5*, *Pi54* and *Bph20* in the background of Krishna Hamsa. DP-Donor parent, RP-Recurrent parent.

**Supplementary Table S1.** Selection of polymorphic markers between recurrent parents and donors for foreground selection

| Gene/QTL        | Markers screened for FS                                                                                                                | Selected Markers     | References |
|-----------------|----------------------------------------------------------------------------------------------------------------------------------------|----------------------|------------|
| <i>xa5</i>      | RM122, RM159, RM13, RM17795, RM4777, RM122, xa5R, xa5S, RM13,                                                                          |                      | [58]       |
| <i>xa13</i>     | xa13 pro, RM6765, RM6070, SR6                                                                                                          | xa13 pro             | [14]       |
| <i>Xa21</i>     | pTA248, <i>Xa21</i>                                                                                                                    | pTA248               | [59]       |
| <i>Pi2</i>      | RM 527                                                                                                                                 | RM 527               | [28]; [60] |
| <i>Pi9</i>      | S29742c, S53395c, RM 136, RM7311, PI9STS2                                                                                              | PI9STS2              | [59]       |
| <i>Pi54</i>     | PiKh MAS                                                                                                                               | PiKh MAS             | [28]; [60] |
| <i>Bph20</i>    | RM 28570, B42, B44                                                                                                                     | RM 28570             | [31]       |
| <i>Bph21</i>    | RM 28491, S12094AF, RM2857OF, B122                                                                                                     | RM 28491             | [31]       |
| <i>qDTY1.1</i>  | RM11943, RM212, RM315, RM3825, RM12091, RM12023, RM431,                                                                                | RM431, RM11943       | [61]       |
| <i>qDTY3.1</i>  | RM15736, RM15738, RM15926, RM15924, RM16032, RM15914, RM15925, RM55, RM168, RM186, RM293, RM468, RM571, RM16030, RM16049, RM416, RM520 | RM168                | [37]       |
| <i>qDTY2.1</i>  | Hvssr2-31                                                                                                                              | HvSSR2-31            | [62]       |
| <i>qDTY12.1</i> | RM 511 , RM 28166,                                                                                                                     | RM511/28158, RM28166 | [35]       |

**FS- foreground selection**

**Supplementary Table S2** Analysis of Variance for days to fifty percent flowering and grain yield (g/m<sup>2</sup>) traits under control conditions (*kharif* 2019)

| Source of Variation   | d.f | DFF          |              |              | GY (g/m <sup>2</sup> ) |              |              |
|-----------------------|-----|--------------|--------------|--------------|------------------------|--------------|--------------|
|                       |     | Mean Squares | F-Calculated | Significance | Mean Squares           | F-Calculated | Significance |
| Blocks (eliminating 4 | 4   | 0.50         | 0.24         | 0.91         | 36910                  | 2.12         | 0.13         |

|                             |     |        |       |      |        |      |      |
|-----------------------------|-----|--------|-------|------|--------|------|------|
| treatments)                 |     |        |       |      |        |      |      |
| Treatment (ignoring blocks) | 199 | 65.17  | 31.79 | 0.00 | 122242 | 7.01 | 0.00 |
| Control                     | 4   | 78.30  | 38.20 | 0.00 | 13582  | 0.78 | 0.56 |
| Treatments                  | 194 | 64.37  | 31.41 | 0.00 | 124637 | 7.15 | 0.00 |
| Control <i>Vs</i> Treatment | 1   | 166.80 | 81.37 | 0.00 | 92278  | 5.29 | 0.04 |
| Error                       | 16  | 2.05   |       |      | 17437  |      |      |
| Total                       | 219 |        |       |      |        |      |      |

Treatment refers to 196 introgression lines, control to five checks in Augmented block design. d.f.- degrees of freedom, DFF- days to fifty percent flowering, GY- grain yield in g/m<sup>2</sup>. F value indicates significant differences among the ILs and checks under non-stress conditions across different sources of variation except 'blocks' and 'control'.

**Supplementary Table S3 Analysis of Variance for days to fifty percent flowering and grain yield (g/m<sup>2</sup>) traits under reproductive stage drought stress conditions (*kharif* 2019)**

| Source of Variation             | d.f. | DFF          |              |              | GY (g/m <sup>2</sup> ) |              |              |
|---------------------------------|------|--------------|--------------|--------------|------------------------|--------------|--------------|
|                                 |      | Mean Squares | F-Calculated | Significance | Mean Squares           | F-Calculated | Significance |
| Blocks (eliminating treatments) | 4    | 30863        | 0.98         | 0.45         | 7726                   | 1.11         | 0.39         |
| Treatment (ignoring blocks)     | 101  | 1692         | 0.05         | 1.00         | 22713                  | 3.25         | 0.01         |
| Control                         | 4    | 35508        | 1.13         | 0.38         | 93420                  | 13.38        | 0.00         |
| Treatments                      | 96   | 44           | 0.00         | 1.00         | 15129                  | 2.17         | 0.04         |
| Control <i>Vs</i> Treatment     | 1    | 24602        | 0.78         | 0.39         | 467992                 | 67.02        | 0.00         |
| Error                           | 16   | 31542        |              |              | 6983                   |              |              |
| Total                           | 121  |              |              |              |                        |              |              |

Treatment refers to 196 introgression lines, control to five checks in Augmented block design. d.f.- degrees of freedom, DFF- days to fifty percent flowering, GY- grain yield in g/m<sup>2</sup>. F value indicates significant differences among the ILs and checks under reproductive stage drought stress conditions across different sources of variation except 'blocks' and 'treatment'.

**Supplementary Table S4 Descriptive statistics and heritability for days to fifty percent flowering and grain yield (g/m<sup>2</sup>) traits under control conditions (*kharif* 2019)**

|                          | Control |                        | Reproductive stage drought stress |                        |
|--------------------------|---------|------------------------|-----------------------------------|------------------------|
|                          | DFF     | GY (g/m <sup>2</sup> ) | DFF                               | GY (g/m <sup>2</sup> ) |
| Mean                     | 98.77   | 574                    | 99.51                             | 403                    |
| Standard Error           | 0.52    | 22.66                  | 7.36                              | 12.85                  |
| Standard Deviation       | 7.71    | 336.17                 | 81.26                             | 141.94                 |
| Range                    | 32      | 2889                   | 911                               | 624                    |
| Minimum                  | 86      | 108                    | 76                                | 98                     |
| Maximum                  | 118     | 2998                   | 106                               | 722                    |
| <b>h<sup>2</sup>(bs)</b> | 96.81   | 86.00                  | 49.96                             | 70.73                  |

DFF- days to fifty percent flowering, GY- grain yield in g/m<sup>2</sup>.

**Supplementary Table S5 Critical differences (CD) for days to fifty percent flowering and grain yield (g/m<sup>2</sup>) traits under reproductive stage drought stress conditions (*kharif* 2019)**

| Comparison type                          | Control     |             |                        |             | Reproductive stage drought stress |             |                        |             |
|------------------------------------------|-------------|-------------|------------------------|-------------|-----------------------------------|-------------|------------------------|-------------|
|                                          | DFF         |             | GY (g/m <sup>2</sup> ) |             | DFF                               |             | GY (g/m <sup>2</sup> ) |             |
|                                          | C.D. at 5 % | C.D. at 1 % | C.D. at 5 %            | C.D. at 1 % | C.D. at 5 %                       | C.D. at 1 % | C.D. at 5 %            | C.D. at 1 % |
|                                          |             |             |                        |             |                                   |             |                        |             |
| Between two Control Mean                 | 1.92        | 2.65        | 238                    | 328         | 112                               | 154         | 177                    | 244         |
| Between two treatments in same block     | 4.29        | 5.91        | 532                    | 734         | 251                               | 345         | 396                    | 545         |
| Between two treatments not in same block | 4.70        | 6.48        | 583                    | 804         | 274                               | 378         | 434                    | 598         |
| Between treatment and control            | 3.64        | 5.02        | 452                    | 622         | 213                               | 293         | 336                    | 463         |

DFF- days to fifty percent flowering, GY- grain yield in g/m<sup>2</sup>, C.D. Critical difference

**Supplementary Table S6 Phenotypic evaluation for yield under control conditions (*kharif* 2019)**

| Entry No                           | DFF | GY (g/m <sup>2</sup> ) |
|------------------------------------|-----|------------------------|
| <b>PC I: BLB + blast + drought</b> |     |                        |
| 19174                              | 99  | 737                    |
| 19193                              | 97  | 374                    |
| 19196                              | 90  | 544                    |
| 19246                              | 93  | 561                    |
| 19247                              | 112 | 598                    |
| <b>PC II: BLB+ blast</b>           |     |                        |
| 19019                              | 97  | 610                    |
| 19030                              | 92  | 1010                   |
| 19471                              | 93  | 543                    |
| 19007                              | 89  | 489                    |
| 19020                              | 98  | 716                    |
| 19025                              | 90  | 766                    |
| 19031                              | 88  | 872                    |
| 19406                              | 95  | 311                    |
| 19039                              | 88  | 644                    |
| 19378                              | 92  | 567                    |
| <b>PC III: BLB + drought</b>       |     |                        |
| 19232                              | 99  | 550                    |
| 19233                              | 111 | 395                    |
| 19238                              | 94  | 600                    |
| 19239                              | 108 | 507                    |
| 19240                              | 109 | 565                    |
| 19241                              | 107 | 693                    |
| 19244                              | 110 | 418                    |
| 19245                              | 101 | 475                    |
| 19248                              | 113 | 628                    |
| <b>PC IV: Blast + drought</b>      |     |                        |
| 19176                              | 105 | 603                    |
| 19177                              | 92  | 433                    |
| 19178                              | 99  | 570                    |
| 19181                              | 97  | 407                    |
| 19182                              | 99  | 341                    |
| 19183                              | 99  | 301                    |
| 19185                              | 92  | 1736                   |
| 19189                              | 93  | 501                    |
| 19190                              | 92  | 345                    |
| 19191                              | 99  | 721                    |
| 19192                              | 98  | 298                    |
| 19194                              | 100 | 446                    |
| 19195                              | 88  | 586                    |
| 19197                              | 92  | 243                    |
| 19198                              | 109 | 334                    |
| 19199                              | 110 | 402                    |
| 19200                              | 88  | 449                    |
| 19201                              | 92  | 666                    |
| 19203                              | 111 | 296                    |
| 19204                              | 114 | 343                    |
| 19205                              | 101 | 372                    |
| 19206                              | 92  | 330                    |
| 19208                              | 94  | 349                    |
| 19211                              | 101 | 1289                   |
| 19214                              | 98  | 552                    |
| 19215                              | 96  | 404                    |
| 19221                              | 107 | 858                    |

| Entry No            | DFF | GY (g/m <sup>2</sup> ) |
|---------------------|-----|------------------------|
| 19237               | 97  | 642                    |
| 19249               | 100 | 891                    |
| 19250               | 112 | 522                    |
| 19253               | 109 | 315                    |
| 19254               | 111 | 180                    |
| 19261               | 109 | 359                    |
| 19262               | 109 | 368                    |
| 19263               | 111 | 655                    |
| 19264               | 112 | 567                    |
| 19267               | 113 | 655                    |
| 19268               | 108 | 342                    |
| 19271               | 109 | 524                    |
| 19273               | 100 | 875                    |
| 19274               | 111 | 585                    |
| 19275               | 93  | 413                    |
| 19279               | 107 | 284                    |
| <b>PC V: BLB</b>    |     |                        |
| 19046               | 92  | 2244                   |
| 19460               | 103 | 631                    |
| 19379               | 118 | 350                    |
| <b>PC VI: Blast</b> |     |                        |
| 19035               | 92  | 941                    |
| 19004               | 93  | 915                    |
| 19053               | 92  | 908                    |
| 19013               | 87  | 850                    |
| 19403               | 99  | 831                    |
| 19048               | 92  | 823                    |
| 19021               | 95  | 808                    |
| 19005               | 92  | 800                    |
| 19006               | 93  | 794                    |
| 19056               | 92  | 761                    |
| 19027               | 86  | 760                    |
| 19024               | 88  | 757                    |
| 19028               | 92  | 746                    |
| 19026               | 112 | 744                    |
| 19243               | 92  | 743                    |
| 19001               | 108 | 737                    |
| 19022               | 93  | 726                    |
| 19413               | 88  | 712                    |
| 19415               | 99  | 675                    |
| 19402               | 98  | 649                    |
| 19175               | 100 | 646                    |
| 19023               | 93  | 628                    |
| 19401               | 99  | 628                    |
| 19018               | 110 | 588                    |
| 19032               | 95  | 575                    |
| 19421               | 101 | 564                    |
| 19014               | 88  | 548                    |
| 19050               | 96  | 547                    |
| 19043               | 89  | 539                    |
| 19015               | 96  | 522                    |
| 19409               | 89  | 513                    |
| 19044               | 89  | 506                    |
| 19397               | 88  | 501                    |
| 19470               | 92  | 498                    |

| Entry No               | DFF | GY (g/m <sup>2</sup> ) |
|------------------------|-----|------------------------|
| 19466                  | 98  | 496                    |
| 19410                  | 92  | 482                    |
| 19468                  | 101 | 469                    |
| 19464                  | 103 | 467                    |
| 19052                  | 89  | 449                    |
| 19045                  | 88  | 449                    |
| 19210                  | 89  | 434                    |
| 19459                  | 98  | 433                    |
| 19180                  | 92  | 433                    |
| 19469                  | 101 | 428                    |
| 19408                  | 93  | 427                    |
| 19392                  | 99  | 424                    |
| 19387                  | 93  | 415                    |
| 19412                  | 93  | 413                    |
| 19463                  | 103 | 395                    |
| 19467                  | 101 | 388                    |
| 19462                  | 99  | 385                    |
| 19465                  | 97  | 382                    |
| 19386                  | 99  | 372                    |
| 19396                  | 88  | 357                    |
| 19411                  | 92  | 353                    |
| 19461                  | 103 | 345                    |
| 19049                  | 97  | 342                    |
| 19400                  | 99  | 316                    |
| 19033                  | 95  | 315                    |
| 19054                  | 88  | 305                    |
| 19008                  | 92  | 303                    |
| 19037                  | 93  | 292                    |
| 19420                  | 101 | 284                    |
| 19389                  | 93  | 272                    |
| 19038                  | 92  | 264                    |
| 19417                  | 99  | 217                    |
| 19399                  | 89  | 216                    |
| 19407                  | 93  | 201                    |
| 19416                  | 101 | 197                    |
| 19034                  | 93  | 180                    |
| 19394                  | 88  | 141                    |
| 19405                  | 88  | 108                    |
| 19167                  | 88  | 147                    |
| 19172                  | 98  | 362                    |
| 19186                  | 89  | 206                    |
| 19188                  | 92  | 324                    |
| 19202                  | 109 | 1174                   |
| 19207                  | 113 | 606                    |
| 19270                  | 112 | 567                    |
| 19272                  | 111 | 2706                   |
| <b>PC VII: Drought</b> |     |                        |
| 19209                  | 99  | 1282                   |
| 19218                  | 87  | 1221                   |
| 19213                  | 100 | 1023                   |

| Entry No  | DFF   | GY (g/m <sup>2</sup> ) |
|-----------|-------|------------------------|
| 19227     | 109   | 983                    |
| 19231     | 101   | 957                    |
| 19281     | 95    | 820                    |
| 19242     | 93    | 818                    |
| 19277     | 95    | 799                    |
| 19219     | 102   | 786                    |
| 19226     | 97    | 759                    |
| 19280     | 88    | 746                    |
| 19234     | 98    | 734                    |
| 19228     | 106   | 722                    |
| 19251     | 113   | 704                    |
| 19255     | 111   | 684                    |
| 19173     | 100   | 656                    |
| 19257     | 110   | 654                    |
| 19184     | 92    | 588                    |
| 19217     | 88    | 582                    |
| 19252     | 110   | 573                    |
| 19265     | 113   | 565                    |
| 19220     | 114   | 560                    |
| 19230     | 99    | 551                    |
| 19269     | 99    | 544                    |
| 19235     | 97    | 528                    |
| 19168     | 90    | 522                    |
| 19216     | 95    | 522                    |
| 19222     | 109   | 484                    |
| 19229     | 100   | 481                    |
| 19278     | 88    | 475                    |
| 19166     | 92    | 462                    |
| 19179     | 110   | 450                    |
| 19169     | 90    | 449                    |
| 19170     | 107   | 429                    |
| 19187     | 90    | 417                    |
| 19224     | 105   | 416                    |
| 19236     | 96    | 407                    |
| 19266     | 113   | 391                    |
| 19223     | 108   | 373                    |
| 19171     | 98    | 364                    |
| 19259     | 112   | 336                    |
| 19258     | 110   | 326                    |
| 19225     | 108   | 282                    |
| Krishna   | 98.4  | 486.4                  |
| Hamsa     |       |                        |
| MTU       | 98.8  | 473.8                  |
| 1010      |       |                        |
| IR 64     | 99    | 575.6                  |
| Saha      | 102   | 476.4                  |
| bhagidhan |       |                        |
| IR81896   | 107.8 | 571.6                  |

DFF- days to fifty percent flowering, GY- grain yield in g/m<sup>2</sup>.

**Supplementary Table S7 Phenotypic evaluation for yield under reproductive stage drought stress (*kharif* 2019)**

| Entry No                           | DFF | GY (g/m <sup>2</sup> ) |
|------------------------------------|-----|------------------------|
| <b>PC I: BLB + blast + drought</b> |     |                        |
| 19246                              | 100 | 538                    |

| Entry No | DFF | GY (g/m <sup>2</sup> ) |
|----------|-----|------------------------|
| 19247    | 98  | 444                    |
| 19196    | 76  | 423                    |

| Entry No | DFF | GY (g/m <sup>2</sup> ) |
|----------|-----|------------------------|
| 19174    | 95  | 350                    |
| 19193    | 90  | 323                    |

| Entry No                     | DFF | GY<br>(g/m <sup>2</sup> ) | Entry No               | DFF | GY<br>(g/m <sup>2</sup> ) | Entry No  | DFF | GY<br>(g/m <sup>2</sup> ) |
|------------------------------|-----|---------------------------|------------------------|-----|---------------------------|-----------|-----|---------------------------|
| <b>PC III: BLB + drought</b> |     |                           |                        |     |                           |           |     |                           |
| 19233                        | 95  | 638                       | 19183                  | 95  | 411                       | 19281     | 94  | 479                       |
| 19245                        | 93  | 635                       | 19214                  | 98  | 410                       | 19242     | 95  | 473                       |
| 19248                        | 101 | 452                       | 19194                  | 91  | 387                       | 19266     | 101 | 472                       |
| 19232                        | 97  | 436                       | 19250                  | 87  | 381                       | 19252     | 95  | 451                       |
| 19240                        | 87  | 433                       | 19200                  | 98  | 380                       | 19216     | 95  | 451                       |
| 19238                        | 95  | 333                       | 19189                  | 81  | 351                       | 19170     | 95  | 450                       |
| 19241                        | 91  | 307                       | 19191                  | 98  | 347                       | 19259     | 90  | 439                       |
| 19239                        | 93  | 307                       | 19208                  | 85  | 332                       | 19258     | 86  | 414                       |
| 19244                        | 99  | 251                       | 19190                  | 82  | 324                       | 19236     | 95  | 408                       |
| 19273                        | 94  | 694                       | 19176                  | 90  | 324                       | 19166     | 90  | 404                       |
| 19198                        | 98  | 691                       | 19237                  | 95  | 313                       | 19228     | 99  | 390                       |
| 19178                        | 106 | 685                       | 19203                  | 76  | 299                       | 19213     | 99  | 387                       |
| 19254                        | 95  | 618                       | 19197                  | 76  | 298                       | 19218     | 95  | 368                       |
| 19215                        | 97  | 597                       | 19271                  | 92  | 293                       | 19209     | 86  | 360                       |
| 19274                        | 97  | 581                       | 19182                  | 95  | 281                       | 19169     | 83  | 353                       |
| 19201                        | 95  | 574                       | 19206                  | 87  | 273                       | 19217     | 95  | 351                       |
| 19177                        | 85  | 560                       | 19205                  | 81  | 224                       | 19257     | 87  | 344                       |
| 19268                        | 95  | 554                       | 19185                  | 83  | 221                       | 19227     | 99  | 314                       |
| 19262                        | 90  | 535                       | <b>PC VII: Drought</b> |     |                           | 19184     | 91  | 287                       |
| 19199                        | 101 | 514                       | 19226                  | 94  | 722                       | 19187     | 81  | 275                       |
| 19267                        | 102 | 508                       | 19278                  | 94  | 660                       | 19220     | 99  | 254                       |
| 19181                        | 97  | 506                       | 19251                  | 95  | 608                       | 19229     | 96  | 254                       |
| 19264                        | 91  | 490                       | 19231                  | 96  | 605                       | 19171     | 83  | 248                       |
| 19261                        | 77  | 488                       | 19280                  | 99  | 584                       | 19168     | 83  | 243                       |
| 19195                        | 77  | 487                       | 19234                  | 95  | 582                       | 19255     | 95  | 238                       |
| 19279                        | 94  | 477                       | 19224                  | 98  | 557                       | 19230     | 96  | 237                       |
| 19275                        | 94  | 467                       | 19277                  | 94  | 547                       | Krishna   |     |                           |
| 19249                        | 76  | 461                       | 19225                  | 94  | 546                       | Hamsa     | 88  | 192                       |
| 19211                        | 99  | 451                       | 19219                  | 95  | 523                       | MTU 1010  | 88  | 238                       |
| 19192                        | 83  | 448                       | 19223                  | 93  | 512                       | IR 64     | 92  | 347                       |
| 19263                        | 100 | 440                       | 19222                  | 93  | 508                       | Sahabhagi |     |                           |
| 19253                        | 95  | 434                       | 19235                  | 95  | 503                       | dhan      | 89  | 144                       |
| 19221                        | 93  | 412                       | 19173                  | 95  | 489                       | IR81896   | 102 | 485                       |
|                              |     |                           | 19269                  | 89  | 487                       |           |     |                           |

DFF- days to fifty percent flowering, GY- grain yield in g/m<sup>2</sup>.

**Supplementary Table S8. Polymorphic markers between pairs of parents for use in background selection**

| Chr. No. | Total No. of markers analyzed | Polymorphism between Krishna Hama and each of the donor parent |         |         |         |         |         |
|----------|-------------------------------|----------------------------------------------------------------|---------|---------|---------|---------|---------|
|          |                               | IRBB60                                                         | Tetep   | DSB2    | IR74371 | IR81896 | IR96321 |
| 1        | 44                            | RM3341                                                         | RM10074 | RM594   | RM10074 | RM10074 | RM10074 |
|          |                               | RM488                                                          | RM243   | RM11068 | RM595   | RM3627  | RM243   |
|          |                               | RM11377                                                        | RM3627  | RM11191 | RM3341  | RM595   | RM3627  |
|          |                               | RM212                                                          | RM10963 | RM3341  | RM488   | RM3341  | RM595   |
|          |                               | (4)                                                            | RM3341  | RM488   | RM11377 | RM488   | RM3341  |
|          |                               |                                                                | RM11391 | RM11377 | RM11943 | RM11377 | RM5853  |
|          |                               |                                                                | RM1244  | RM11391 | RM12276 | RM11943 | RM2318  |
|          |                               |                                                                | RM11569 | RM297   | (7)     | (7)     | RM488   |
|          |                               |                                                                | RM3825  | RM11943 |         |         | RM11377 |
|          |                               |                                                                | RM11943 | (9)     |         |         | RM11391 |
|          |                               |                                                                | RM12276 |         |         |         | RM1117  |
|          |                               |                                                                | (11)    |         |         |         | RM297   |
|          |                               |                                                                |         |         |         |         | RM3825  |
|          |                               |                                                                |         |         |         |         | RM11943 |
|          |                               |                                                                |         |         |         |         | (14)    |
| 2        | 34                            | RM6378                                                         | RM12433 | RM12433 | RM3549  | RM12307 | RM13384 |
|          |                               | RM2468                                                         | RM6378  | RM6378  | RM1234  | RM12434 | RM3515  |

| Chr.<br>No. | Total No.<br>of markers<br>analyzed | Polymorphism between Krishna Hama and each of the donor parent    |                                                                                          |                                                                                                 |                                                                    |                                                                       |                                                            |
|-------------|-------------------------------------|-------------------------------------------------------------------|------------------------------------------------------------------------------------------|-------------------------------------------------------------------------------------------------|--------------------------------------------------------------------|-----------------------------------------------------------------------|------------------------------------------------------------|
|             |                                     | IRBB60                                                            | Tetep                                                                                    | DSB2                                                                                            | IR74371                                                            | IR81896                                                               | IR96321                                                    |
|             |                                     | RM3549<br>RM1234<br>RM3515<br>RM13607<br>RM1942<br>RM13863<br>(8) | RM3549<br>RM1234<br>RM3515<br>RM13607<br>RM1942<br>RM13863<br>(8)                        | RM2468<br>RM3549<br>RM6374<br>RM4499<br>RM13393<br>RM13607<br>RM1942<br>RM3316<br>RM208<br>(11) | RM6374<br>RM13384<br>RM13393<br>RM3515<br>RM13863<br>RM3316<br>(8) | RM279<br>RM6378<br>RM3549<br>RM13384<br>RM3515<br>RM208<br>(8)        | RM13607<br>RM13863<br>RM3316<br>RM14170(6)                 |
| 3           | 35                                  | RM15223<br>RM8072<br>(2)                                          | RM15488<br>RM15803<br>RM520<br>RM8072<br>(4)                                             | RM8072<br>(1)                                                                                   | RM3350<br>RM520(2)                                                 | RM15191<br>RM16<br>RM15488<br>RM3350<br>RM520(5)                      | RM15488<br>RM520<br>RM8072<br>(3)                          |
| 4           | 41                                  | RM16591<br>RM16864<br>RM551<br>RM8213<br>RM 8072<br>(5)           | RM16262<br>RM16591<br>RM17022<br>RM17104<br>RM17305<br>RM551<br>RM8213<br>RM 8072<br>(8) | RM16459<br>RM16591<br>RM16642<br>RM17022<br>RM8213<br>RM 8072<br>(6)                            | RM<br>80729(1)                                                     | RM16262<br>RM16591<br>RM17022<br>RM551<br>RM8213<br>(5)               | RM8213<br>RM551<br>RM17022<br>RM16591<br>(4)               |
| 5           | 26                                  | RM1248<br>RM17855<br>RM18394<br>RM3381<br>RM18933(5)              | RM17855<br>RM18018<br>(2)                                                                | RM17855<br>RM18018<br>(2)                                                                       | --                                                                 | --                                                                    | --                                                         |
| 6           | 45                                  | RM588<br>RM206<br>RM439<br>(3)                                    | RM588<br>RM19642<br>(2)                                                                  | RM589<br>RM19642<br>(2)                                                                         | --                                                                 | RM588<br>RM253<br>RM19642<br>RM18405<br>RM3437<br>RM206<br>RM19056(7) | RM588<br>RM253<br>RM19642<br>RM3437<br>RM206<br>RM19056(6) |
| 7           | 37                                  | RM20794<br>RM20896<br>RM21445<br>RM20917<br>(4)                   | RM 20794<br>RM20896<br>RM21445<br>RM22100<br>(4)                                         | RM1135<br>RM21445<br>RM20917<br>(3)                                                             | RM1135<br>RM20794<br>RM 144<br>(3)                                 | RM 144<br>RM20794<br>RM209179(3)                                      | --                                                         |
| 8           | 23                                  | RM407<br>RM1235<br>(2)                                            | RM 38<br>RM22551<br>RM22710<br>RM407<br>RM 447<br>(5)                                    | RM22685<br>(1)                                                                                  | RM38<br>RM22709<br>RM22710<br>RM2251<br>RM515<br>(5)               | RM515<br>RM22710<br>RM22709(3)                                        | RM2251<br>RM22709<br>RM22710<br>RM515(4)                   |
| 9           | 19                                  | --                                                                | --                                                                                       | RM24715<br>RM7481<br>(2)                                                                        | --                                                                 | --                                                                    | --                                                         |
| 10          | 23                                  | RM25187<br>RM6100<br>RM332<br>(3)                                 | RM25124<br>RM25187<br>RM25658<br>RM25846<br>RM216<br>RM25581                             | RM24899<br>RM25187<br>RM25472<br>RM25846<br>RM6100<br>RM 216                                    | --                                                                 | RM24899<br>RM25124<br>RM6100<br>RM25581<br>(4)                        | RM25124<br>RM25472<br>RM332(3)                             |

| Chr.<br>No.  | Total No.<br>of markers<br>analyzed | Polymorphism between Krishna Hama and each of the donor parent  |                                               |                                                                   |           |                                                           |                                    |
|--------------|-------------------------------------|-----------------------------------------------------------------|-----------------------------------------------|-------------------------------------------------------------------|-----------|-----------------------------------------------------------|------------------------------------|
|              |                                     | IRBB60                                                          | Tetep                                         | DSB2                                                              | IR74371   | IR81896                                                   | IR96321                            |
|              |                                     |                                                                 | RM332<br>(7)                                  | RM 258<br>(7)                                                     |           |                                                           |                                    |
| 11           | 25                                  | RM206<br>RM26200<br>RM332<br>RM4112<br>(4)                      | RM224<br>RM26119<br>RM26200<br>RM27322<br>(4) | RM202<br>RM26200<br>RM26315<br>RM27322<br>RM332<br>RM27367<br>(6) | --        | RM26200<br>RM27322<br>RM332<br>(3)                        | RM206<br>RM26200<br>RM27322<br>(3) |
| 12           | 23                                  | RM28199<br>RM28488<br>RM3331<br>RM28570<br>RM235<br>RM17<br>(6) | RM224<br>RM17<br>RM27289<br>(3)               | RM28199<br>RM28357<br>RM28488<br>RM3331<br>(4)                    | --        | RM7102<br>RM28357<br>RM28488<br>RM28570<br>RM28166<br>(5) | RM26200<br>RM27322<br>RM332<br>(3) |
| <b>Total</b> | <b>375</b>                          | <b>47</b>                                                       | <b>58</b>                                     | <b>54</b>                                                         | <b>26</b> | <b>50</b>                                                 | <b>47</b>                          |
